# Supplementary material for: l-cysteine-induced degradation of organic mercury as a novel interface in the HPLC-CV-AFS hyphenated system for speciation of mercury
Source: Royal Society of Chemistry journal article supplement (doi:10.1039/b924291k), 2010-01-01

## **Electronic supplementary information**

L-cysteine-induced degradation of organic mercury as a novel interface in the HPLC-CV-AFS hyphenated system for speciation of mercury

*Zhen-hua Wang, Yong-guang Yin, Bin He, Jian-bo Shi, Gui-bin Jiang\**

State Key Laboratory of Environmental Chemistry and Ecotoxicology, Research Center for Eco-Environmental Sciences, Chinese Academy of Sciences, P.O. Box 2871, Beijing 100085, China.

## Figures

**Fig. S1** Effects of the concentration and flow rate of  $\text{KBH}_4$  on fluorescence signal intensity. Each mercury species present at  $10 \mu\text{g L}^{-1}$ . Other conditions were given in Table 1. (A) Flow rate of  $\text{KBH}_4$  was  $2.5 \text{ mL min}^{-1}$ . (B) The concentration of  $\text{KBH}_4$  was  $0.5\% (\text{m/V})$ .

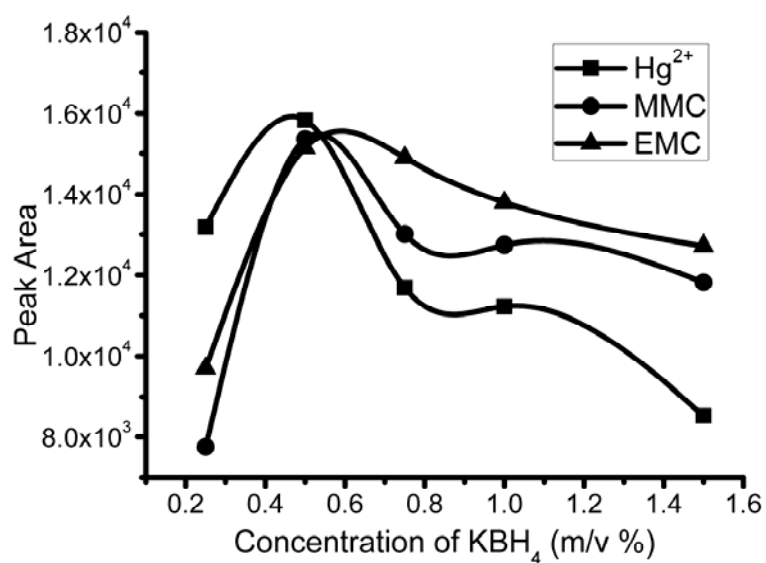

(A)

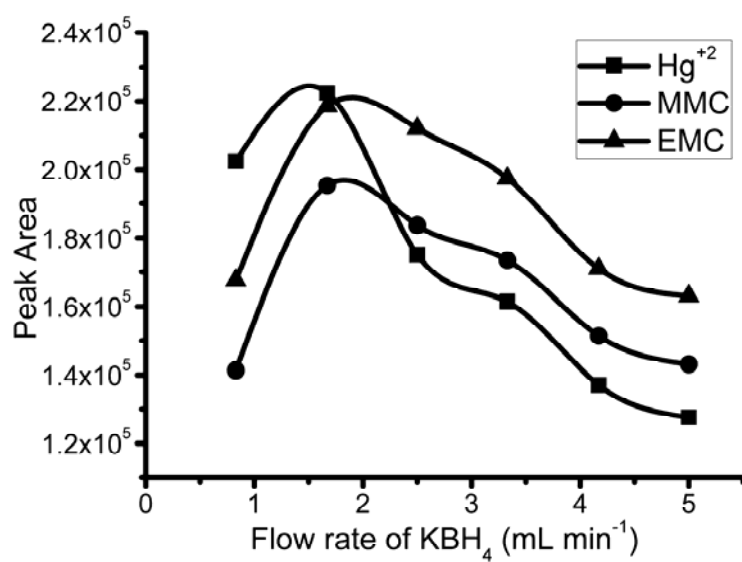

(B)

**Fig. S2** Effects of the concentration and flow rate of HCl on fluorescence signal intensity. Each mercury species present at  $10\ \mu\text{g L}^{-1}$ . Other conditions were given in Table 1.

(A) Flow rate of HCl was  $2.5\ \text{mL min}^{-1}$ . (B) The concentration of HCl was 10% (V/V).

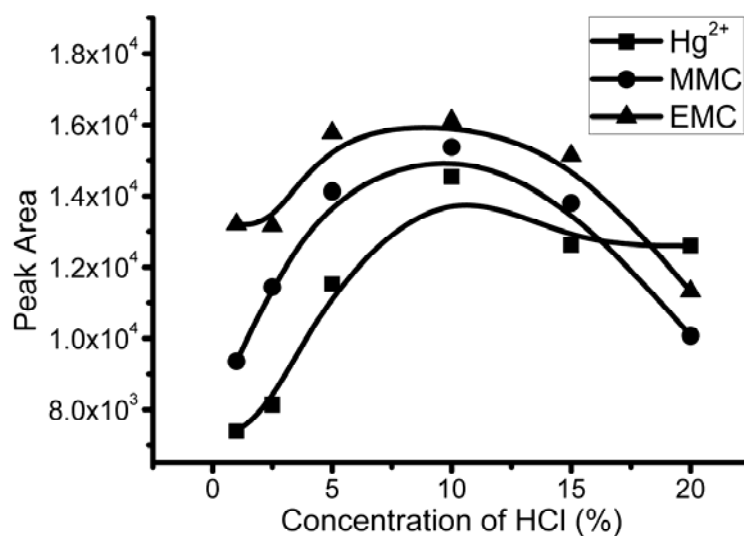

(A)

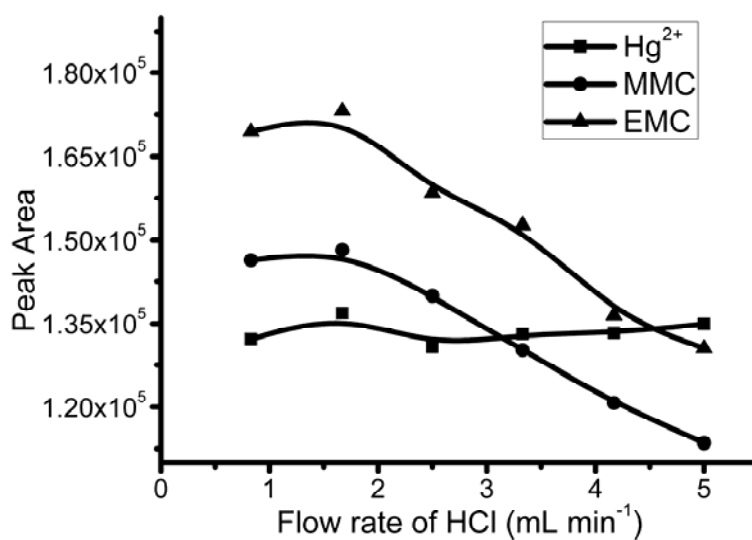

(B)

**Fig. S3** Effects of flow rate of carrier gas and auxiliary gas. Each mercury species present at  $10 \mu\text{g L}^{-1}$ .

Other conditions were given in Table 1. (A) Flow rate of auxiliary gas was  $300 \text{ mL min}^{-1}$ . (B) Flow rate of carrier gas was  $300 \text{ mL min}^{-1}$ .

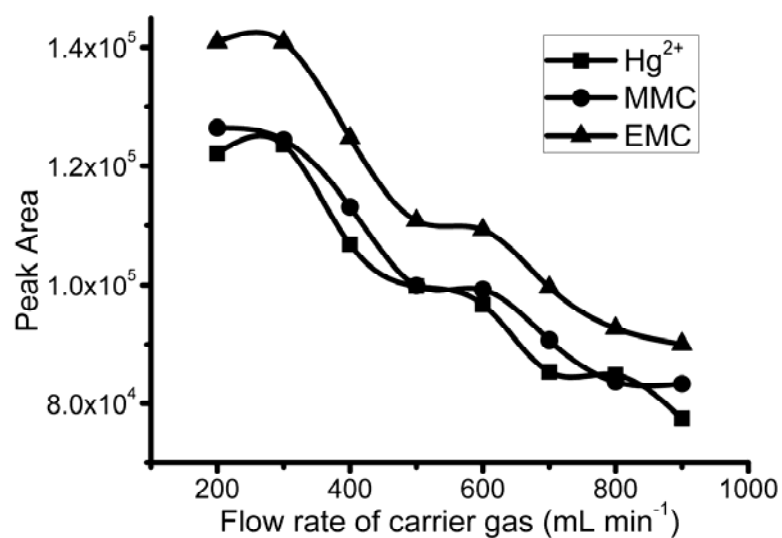

(A)

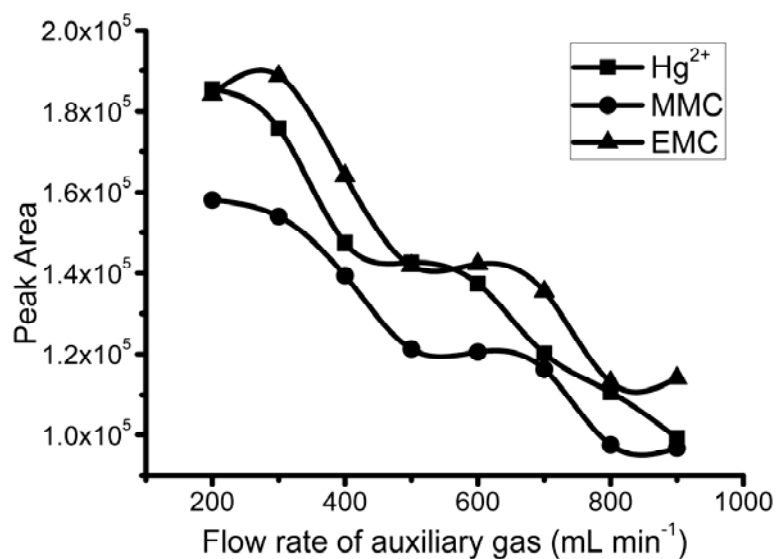

(B)

**Fig. S4** Typical Chromatograms of three mercury species using this new method and HPLC-UV-CV-AFS. Concentrations of mercury species:  $50 \mu\text{g L}^{-1}$  as Hg. Retention time of mercury species using this new HPLC-CV-AFS system:  $\text{Hg}^{2+}$ , 3.5 min; MMC, 6.3 min; EMC, 15.5 min. Retention time of mercury species in HPLC-UV-CV-AFS system: MMC, 16 min;  $\text{Hg}^{2+}$  17.0 min; EMC, 42.5 min.

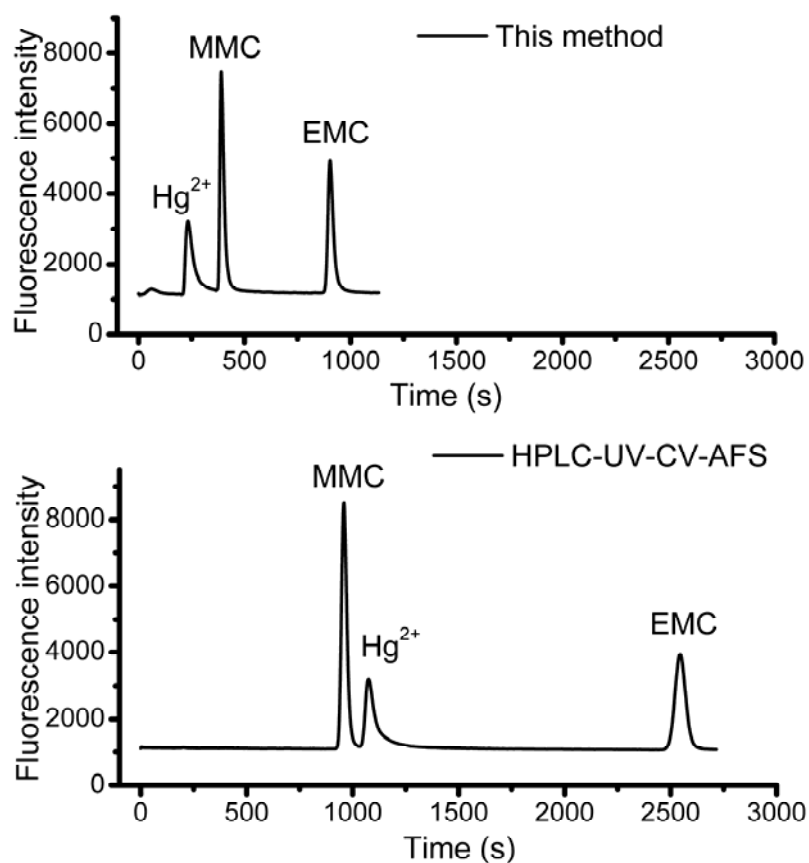

Supplement: b924291k.pdf [file b924291k.pdf]
